# Supplementary material for: Highly oriented Langmuir–Blodgett film of silver cuboctahedra as an effective matrix-free sample plate for surface-assisted laser desorption/ionization mass spectrometry
Source: Royal Society of Chemistry journal article supplement (doi:10.1039/c7nr04098a), 2017-01-01
Supplement: c7nr04098a1.pdf [file c7nr04098a1.pdf]

## Supporting Information

### **Highly oriented langmuir-blodgett film of silver cuboctahedra as an effective matrix-free sample plate in surface-assisted laser desorption/ionization mass spectrometry**

Tsung-Rong Kuo,<sup>a,b</sup> Yin-Chien Chen,<sup>c</sup> Chiung-I Wang,<sup>d</sup> Tzu-Hau Shen,<sup>d</sup> Hong-Yi Wang,<sup>d</sup> Xi-Yu Pan,<sup>a</sup> Di-Yan Wang,<sup>e</sup> Chien-Chung Liou<sup>e</sup>, Yi-Hsuan Chang<sup>e</sup>, Yi-Chia Chen<sup>e</sup>, Yueh-Hsiu Wu<sup>e</sup>, Yun-Ru Liu<sup>f</sup>, Yun-Ho Lin,<sup>\*g,h</sup> Cho-Chun Hu<sup>\*c</sup> and Chia-Chun Chen<sup>\*d</sup>

<sup>a</sup>Graduate Institute of Nanomedicine and Medical Engineering, College of Biomedical Engineering, Taipei Medical University, Taipei 11031, Taiwan

<sup>b</sup>International Ph.D. Program in Biomedical Engineering, College of Biomedical Engineering, Taipei Medical University, Taipei 11031, Taiwan

<sup>c</sup>Department of Applied Science, National Taitung University, Taitung 95002, Taiwan

<sup>d</sup>Department of Chemistry, National Taiwan Normal University, Taipei 11677, Taiwan

<sup>e</sup>Department of Chemistry, Tunghai University, Taichung 40704, Taiwan

<sup>f</sup>Joint Biobank, Office of Human Research, Taipei Medical University, Taipei 11031, Taiwan

<sup>g</sup>Division of Oral Pathology, Department of Dentistry, Taipei Medical University Hospital, Taipei 11031, Taiwan

<sup>h</sup>School of Dentistry, College of Oral Medicine, Taipei Medical University, Taipei 11031, Taiwan

\*Corresponding author E-mail: kevinylh@tmu.edu.tw, cchu@nttu.edu.tw and

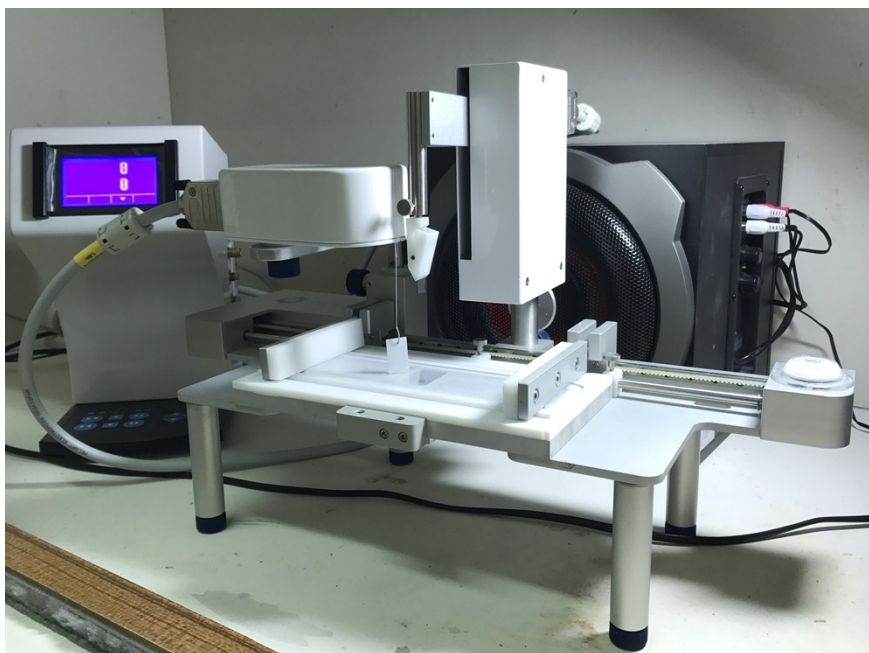

**Figure S1.** KSV NIMA LB Trough (KN 2001) was used to fabricate silver nanocrystal LB films with precise control of lateral packing density.

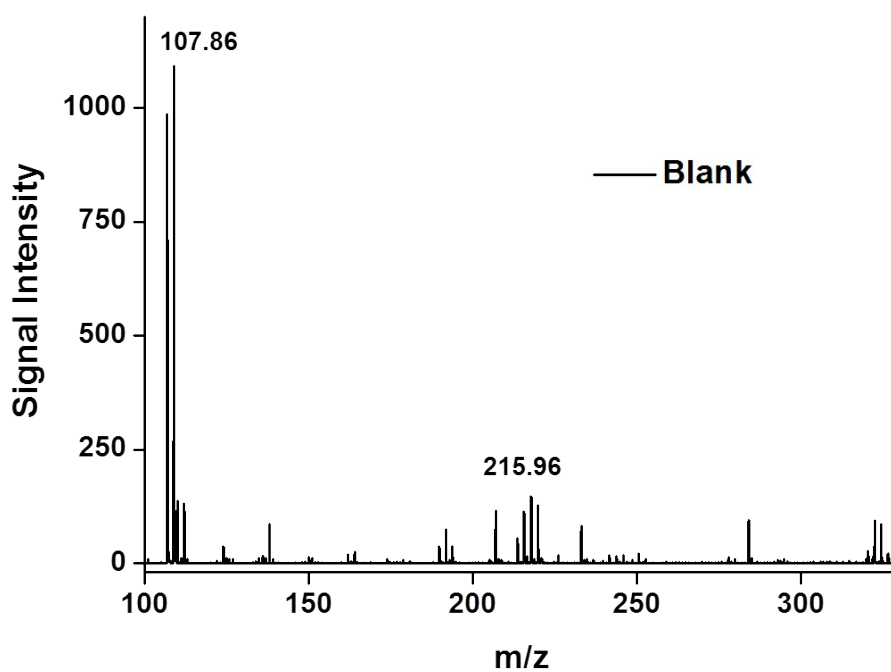

**Figure S2.** Mass spectra obtained from silver cuboctahedron LB film. Peak identity:  $m/z$  107.86,  $[\text{Ag}]^+$ ;  $m/z$  215.96,  $[\text{Ag}_2]^+$ .

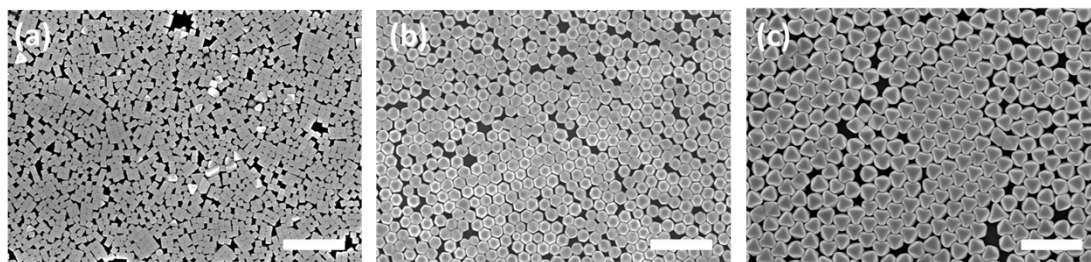

**Figure S3.** Low magnification SEM images of (a) silver cube LB film (b) silver cuboctahedron LB film and (c) silver octahedron LB film. The scale is 1  $\mu\text{m}$ .

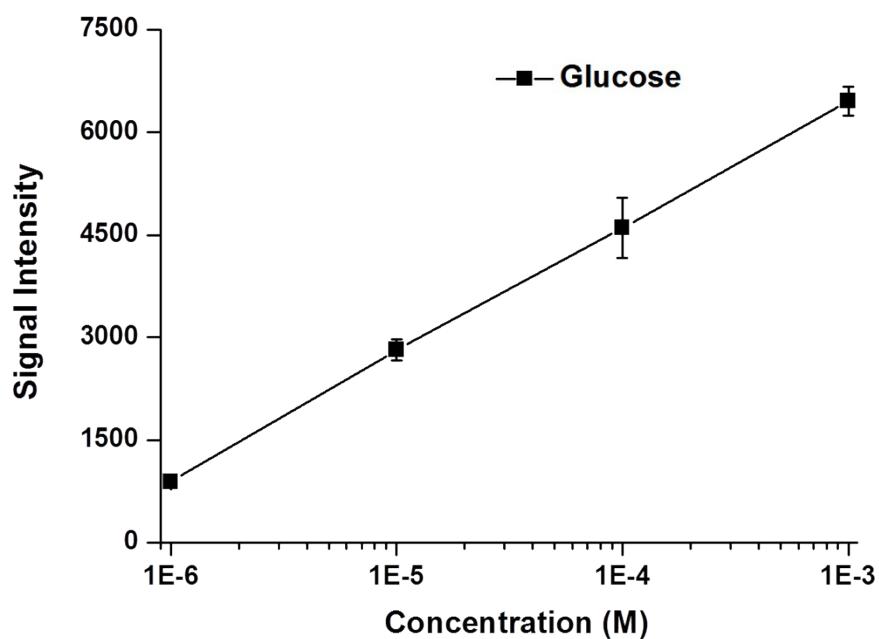

**Figure S4.** Calibration curve of glucose obtained by using sample plate of silver cuboctahedron LB film in SALDI MS. The limit of detection of glucose was obtained to be 1  $\mu\text{M}$ .

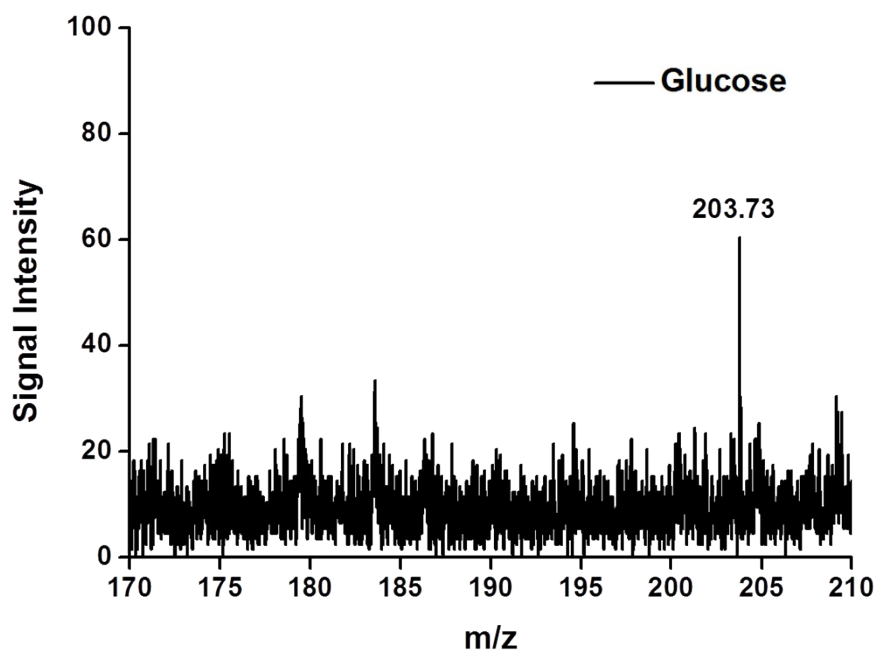

**Figure S5.** Mass spectra of glucose in blood plasma with the use of sample plate of silver cuboctahedron LB film in SALDI MS. Peak identity:  $m/z$  203,  $[\text{Glucose}+\text{Na}]^+$ .

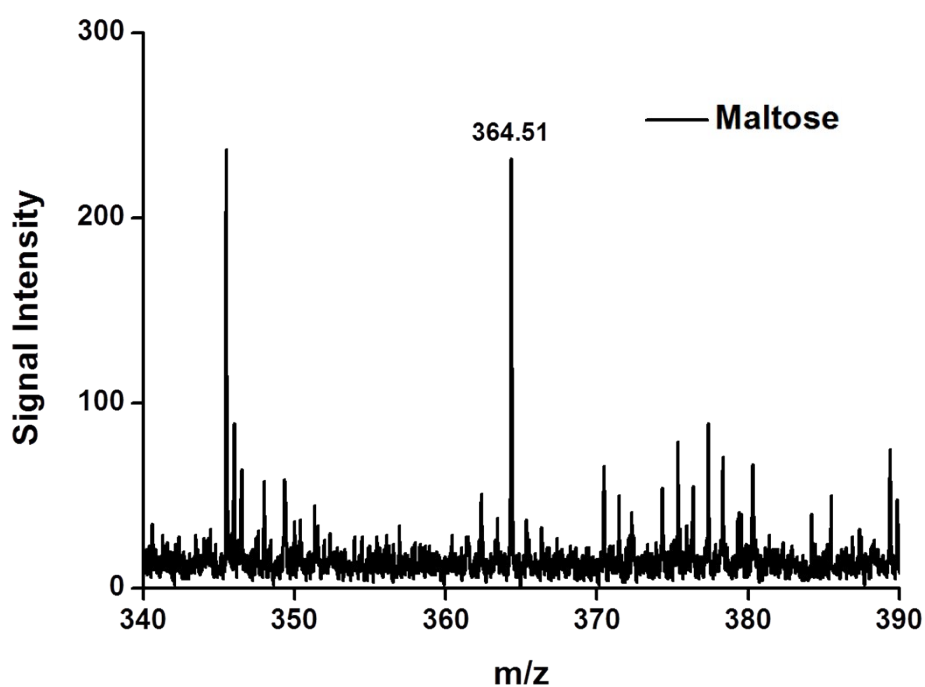

**Figure S6.** Mass spectra of maltose with the use of sample plate of silver cuboctahedron LB film in SALDI MS. The concentration of maltose is  $10^{-4}$  M. Peak identity:  $m/z$  364.51,  $[\text{Maltose}+\text{Na}]^+$ .
